# Supplementary material for: Unveiling the immune and vitamin profiles of blood: the potential biomarkers for alopecia areata
Source: PeerJ. 2025 May 7;13:e19430. doi: 10.7717/peerj.19430 (PMC12065454; doi:10.7717/peerj.19430)
Supplement: Supplemental Information 1 [file peerj-13-19430-s001.xlsx]

## Sheet: AA
AA	Gender	Age-years	Height	Weight	Blood pressure (mmHg)	Eosinophils (10^9 cells/L)	Eosinophils (EO%)	IgE（IU/mL）	IgG(g/L)	IgG4(mg/L)	Water-soluble vitamin								Fat-soluble vitamin						Cytokines
											Vitamin B2(ng/mL)	Vitamin B3(ng/mL)	Vitamin B5(ng/mL)	Vitamin B6(ng/mL)	Vitamin B7(ng/mL)	Folate acid (ng/mL)	5-MTHF (ng/mL)	Vitamin B12	Vitamin A(mg/L)	Vitamin E(mg/L)	25-OH-VD2 (ng/mL)	25-OH-VD3 (ng/mL)	25-OH-VD (D2+D3)(ng/mL)	Vitamin K1(ng/mL)	IL-2 (pg/mL)	IL-4(pg/mL)	IL-6(pg/mL)	IL-10(pg/mL)	TNF-α (pg/mL)	IFN-γ (pg/mL)
1	Female	12.6	155	41	122/80	0.06	1.1	7.08	11.95	304.8	37.4	42.38	38.39	1.68	0.13	<0.44	8.15	<0.10	0.34	6.7	<2.2	21.9	21.9	0.44	0.29	0.82	3.59	1.55	0.89	0.77
2	Female	42	158	52	100/80	0.04	0.8	17.7	13.06	754.9	10.03	48.31	50.2	3.21	<0.08	<0.44	13.58	<0.10	0.59	14	<2.2	27.5	27.5	0.21	0.24	0.71	3.06	1.34	0.35	0.6
3	Male	69	168	65	120/80	0.31	4.4	47.71	12.25	361.8	35.97	29.51	49.41	2.34	0.12	<0.44	8.52	<0.10	0.79	11.3	<2.2	31.4	31.4	1.52	0.26	0.61	5.52	0.97	0.84	0.71
4	Male	38	173	68	124/80	0.22	3.2	173.66	14.16	276.2	6.5	110.08	60.97	1.2	0.13	<0.44	4.02	<0.10	0.72	11.5	<2.2	28.3	28.3	1.12	0.28	0.73	3.41	1.63	1.01	0.69
5	Male	25	169	61	116/70	0.46	8.8	173.64	13.65	222.2	11.9	98.55	35.43	2.41	0.13	<0.44	5.36	<0.10	0.49	11.5	<2.2	10.3	10.3	1.62	0.38	1	3.06	1.13	0.72	0.54
6	Female	20	155	54	120/82	0.14	3	68.46	15.58	438.6	11.35	173.72	51.55	1.65	0.1	<0.44	4.27	<0.10	0.47	8.7	<2.2	10	10	0.44	0.38	1	4.56	1.66	0.74	0.65
7	Male	35	171	65	112/80	0.09	1.6	8.9	11.15	530.9	5.06	34.66	43.92	2.21	0.08	<0.44	7.1	<0.10	0.63	8.3	<2.2	11.4	11.4	1.17	0.41	1.01	4.17	1.89	1.01	0.7
8	Female	43	158	102	136/80	0.06	1.3	51.79	11.62	183.6	15.1	135.94	74.71	2.56	0.19	<0.44	8.75	<0.10	0.51	10.8	<2.2	15.8	15.8	1.6	0.18	0.88	2.44	1.26	0.46	0.58
9	Female	11	147	35	106/76	0.11	3.6	165.5	11.1	605.7	8.81	97.54	38.34	1.17	0.08	<0.44	5.54	<0.10	0.4	9.7	<2.2	13.8	13.8	0.36	0.3	0.95	3.22	1.11	0.4	0.67
10	Female	15	162	50	126/75	0.09	2	23.44	14.24	1120	8.94	107.67	41.63	2.78	0.1	<0.44	5.45	<0.10	0.56	11.8	<2.2	14.9	14.9	0.68	0.33	0.88	4.83	1.65	0.96	0.68
11	Male	29	172	65	129/81	0.25	4	83.37	7.2	819.1	5.14	44.5	39.26	1.45	<0.08	<0.44	5.57	<0.10	0.57	7.3	<2.2	16.4	16.4	0.91	0.33	0.7	3.1	0.99	0.44	0.57
12	Female	36	163	60	132/78	0.04	1.7	126.4	15.15	642.9	5.7	52.65	32.95	1.86	<0.08	<0.44	23.99	<0.10	0.27	9	<2.2	27	27	0.73	0.29	0.65	2.81	1.12	0.75	0.62
13	Male	40	168	84	106/65	0.15	2.1	22.83	10.85	486.7	7.39	43.41	41.63	1.58	<0.08	<0.44	4.86	<0.10	0.73	9.9	<2.2	19.2	19.2	2.12	0.29	0.76	2.73	1.19	0.58	0.57
14	Male	23	170	60	131/91	0.22	3.6	26.25	9.57	431.8	4.64	51.3	34.23	1.72	<0.08	<0.44	5.92	<0.10	0.64	12	<2.2	23	23	1.3	0.66	0.95	4.55	1.97	1.3	0.68
15	Female	19	162	67	121/69	0.1	1.3	53.64	12.2	461.6	6.84	39.42	38.51	1.6	0.1	<0.44	4.87	<0.10	0.35	7.1	<2.2	19.3	19.3	2.09	0.77	0.86	4.96	1.49	1.31	0.68
16	Female	35	158	55	132/80	0.01	0.3	6.95	15.38	634.8	19.05	102.06	51.36	3.6	0.11	<0.44	40.87	<0.10	0.5	12.8	<2.2	22.7	22.7	0.8	0.27	10.23	2.81	36.24	0.5	0.89
17	Male	31	180	82	125/78	0.35	7.5	211.62	11.87	582.1	7.82	31.41	42.18	2.87	<0.08	<0.44	8.99	<0.10	0.68	10	<2.2	24	24	1.6	0.49	1.13	4.62	2.04	1.22	0.79
18	Male	17	184	174	130/67	0.14	1.8	138.88	9.64	150	6.28	49.58	47.56	4.33	0.09	0.5	2.24	<0.10	0.51	11	<2.2	15.9	15.9	0.63	0.47	1.19	5.68	2.62	1.28	0.55
19	Female	42	158	55	122/88	0.1	2	20.41	14.27	3560	24.64	122.65	50.67	15.45	<0.08	<0.44	3.58	<0.10	0.41	12.6	<2.2	14.7	14.7	2.59	0.36	21.79	4.87	82.84	0.88	0.77
20	Male	24	160	85	127/79	0.17	2.1	590.33	8.12	160	3.97	32.78	37.08	5.82	0.12	<0.44	4.07	<0.10	0.62	11.8	<2.2	20.1	20.1	0.98	0.58	1.6	3.87	2.63	0.87	0.19
21	Male	37	170	138	110/78	0.13	2.5	34.97	11.63	130	9.61	46.16	53.52	8.78	0.08	<0.44	6.95	<0.10	0.65	14.1	<2.2	13.6	13.6	0.88	0.46	1.21	3.73	2.97	0.73	0.16
22	Male	21	172	70	123/74	0.19	3.9	12.43	11.97	820	10.88	41.01	30.86	2.04	<0.08	<0.44	3.43	<0.10	0.39	11.7	<2.2	17.1	17.1	1.9	0.21	0.65	2.09	1.05	0.43	0.47
23	Male	24	176	71	104/77	0.06	1.1	44.26	13.1	650	9.04	31.27	50.37	52.32	<0.08	<0.44	3.42	<0.10	0.6	13.7	10.2	17	27.2	0.46	0.22	0.78	2.56	1.5	0.48	0.46
24	Female	22	161	49	108/76	0.08	1.2	18.13	9.94	621.4	21.57	21.57	39.11	1.43	0.08	<0.44	4.14	<0.10	0.45	8.6	<2.2	8.7	8.7	0.49	0.22	0.63	3.14	1.02	0.37	0.39
25	Male	36	168	74	110/80	0.24	3.6	60.64	9.62	690	7.78	68.69	40.96	3.46	0.11	0.65	4.08	<0.10	0.65	12.5	<2.2	23.9	23.9	1.61	0.23	0.79	2.62	1.37	0.47	0.53
26	Male	23	177	85	126/70	0.08	2.9	594.22	12.48	190	45.27	142.18	45.76	2.06	0.14	<0.44	3.92	<0.10	0.57	7.4	<2.2	23.4	23.4	1.02	0.46	1.14	2.78	2.41	0.51	0.19
27	Male	18	177	75	125/86	0.06	1.5	228.12	13.14	583.9	10.19	58.29	28.72	2.16	0.14	<0.44	7.5	<0.10	0.49	8.7	<2.2	14	14	0.38	0.3	0.85	3.06	1.5	0.55	0.7
28	Male	27	174	68	135/85	0.3	4	239.03	6.46	501	5.07	46.7	35.52	2.16	<0.08	<0.44	3.74	<0.10	0.54	10.6	<2.2	13.9	13.9	2.42	0.57	6.97	4.98	13.07	1.64	0.74

## Sheet: Control
Control	Gender	Age-years	Height	Weight	Blood pressure (mmHg)	Eosinophils (10^9 cells/L)	Eosinophils (EO%)	IgE（IU/mL）	IgG(g/L)	IgG4(mg/L)	Water-soluble vitamin								Fat-soluble vitamin						Cytokines
											Vitamin B2(ng/mL)	Vitamin B3(ng/mL)	Vitamin B5(ng/mL)	Vitamin B6(ng/mL)	Vitamin B7(ng/mL)	Folate acid (ng/mL)	5-MTHF (ng/mL)	Vitamin B12	Vitamin A(mg/L)	Vitamin E(mg/L)	25-OH-VD2 (ng/mL)	25-OH-VD3 (ng/mL)	25-OH-VD (D2+D3)(ng/mL)	Vitamin K1(ng/mL)	IL-2 (pg/mL)	IL-4(pg/mL)	IL-6(pg/mL)	IL-10(pg/mL)	TNF-α (pg/mL)	IFN-γ (pg/mL)
1	Female	31	150	40	110/60	0.01	0.1	18.01	12.27	632.8	7.28	33.3	52.25	1.1	0.08	<0.44	9.55	<0.10	0.45	10.3	<2.2	10	10	0.16	0.26	0.62	3.18	0.91	0.56	0.67
2	Male	34	182	89	120/80	0.13	1.7	73.35	9.96	829.7	5.48	46.8	47.66	2.37	<0.08	<0.44	4.49	<0.10	0.9	13.3	<2.2	25.8	25.8	1.35	0.29	3.62	3.22	11.68	0.53	0.64
3	Female	29	157	51	108/82	0.06	1.2	25.29	13.5	741.2	4.41	55.06	23.93	1.17	<0.08	<0.44	10.63	<0.10	0.41	7.3	<2.2	14.9	14.9	0.5	0.26	0.64	3.39	1.21	0.49	0.68
4	Female	35	160	55	110/60	0.17	3.2	34.42	13.83	256.3	8.44	38.89	37.62	1.43	0.1	<0.44	9.17	<0.10	0.39	11.1	<2.2	24.3	24.3	0.42	0.45	1	3.14	1.81	0.65	0.66
5	Female	29	163	63	110/60	0.12	1.8	17.14	12.18	1094.4	5.92	28.9	41.87	1.44	<0.08	<0.44	7.82	<0.10	0.43	13.8	<2.2	15	15	3.09	0.6	1.26	4.79	2.78	1.09	0.78
6	Male	26	175	75	130/85	0.09	1.5	82.09	8.26	336.6	4.76	45.76	35.65	2.05	10.8	<0.44	7.16	<0.10	0.5	9.3	<2.2	17.4	17.4	1.41	0.7	0.87	4.45	2.64	1.27	0.67
7	Female	36	162	50.5	105/90	0.02	0.5	165.39	18.36	478.2	31.67	55.59	74.84	5.64	0.2	1.23	23.85	<0.10	0.38	14.4	6.7	13.2	19.9	1.35	0.24	0.51	2.65	0.57	0.38	0.54
8	Male	23	181	85	122/78	0.4	6.4	74.2	13.58	840	8.99	75.07	48.81	2.2	0.08	<0.44	5.34	<0.10	0.74	10.8	<2.2	20.7	20.7	0.38	1.79	2.55	3.47	29.42	0.48	0.03
9	Male	22	180	96	122/72	0.18	2.9	468.47	12.86	900	5.73	67.24	56.2	1.93	0.12	<0.44	5.32	<0.10	0.69	14.8	<2.2	14.2	14.2	3.7	0.48	1.43	3.9	2.71	0.73	0.19
10	Male	22	178	61	118/78	0.65	9.2	1058.83	11.42	870	13.88	92.87	61.27	2.71	0.12	<0.44	1.63	<0.10	0.45	8.1	<2.2	16	16	2.24	0.47	1.51	3.81	2.38	0.48	0.16
11	Male	23	170	63	118/71	0.08	1.5	32.37	11.55	140	8.64	72.96	47.99	2.14	0.14	<0.44	2.37	<0.10	0.44	14	<2.2	15	15	2.34	0.52	1.18	5.17	1.46	0.45	0.22
12	Male	23	158	70	121/76	0.24	3.9	13.44	13.11	2800	5.16	70.91	57.83	2.56	0.1	<0.44	6.7	<0.10	0.59	6.7	<2.2	11	11	1.1	0.48	3.01	4.2	7.73	0.53	0.24
13	Male	30	181	74	118/72	0.12	1.4	30.89	15.4	1280	25.35	52.03	44.47	2.92	0.1	<0.44	3.04	<0.10	0.63	11.7	<2.2	27	27	0.45	0.24	1.56	3.43	16.58	0.49	0.49
14	Female	29	160	48.1	126/70	0.09	1.3	11.02	13.09	70	7.12	59.2	24.94	2.57	0.08	<0.44	5.3	<0.10	0.54	9.2	<2.2	12.1	12.1	0.45	0.29	0.8	2.79	1.81	0.44	0.58
15	Female	33	160	57	128/75	0.23	2.7	194.69	13.43	1240	31.41	31.92	31.6	2.77	0.08	<0.44	11.97	<0.10	0.35	8.7	<2.2	16.8	16.8	0.8	0.27	0.73	2.27	1.05	0.48	0.5
16	Male	35	172	65	112/70	0.2	4.4	219.3	16.3	1540	7.85	48.29	30.55	2.47	0.18	<0.44	9.04	<0.10	0.43	11.2	<2.2	19.9	19.9	0.53	0.23	0.65	2.73	0.9	0.44	0.51
17	Female	26	168	62.5	115/72	0.19	3.4	353.23	13.14	890	11.83	36.07	34.72	2.95	0.12	<0.44	13	<0.10	0.27	7.2	<2.2	14.2	14.2	0.78	0.36	1.3	3.56	3.69	0.59	2.04
18	Female	37	156	53	123/78	0.05	0.8	7.12	13.21	850	5.55	70.3	39.45	3.01	<0.08	<0.44	20.31	<0.10	0.3	7.9	<2.2	17.7	17.7	1.53	0.27	0.88	10.59	1.71	0.77	0.94
19	Male	28	170	62	120/66	0.2	3.1	7.22	9.5	300	7.19	29.67	60.86	2.93	0.12	<0.44	8.65	<0.10	0.47	9.1	<2.2	24.5	24.5	0.53	0.25	0.52	2.47	0.89	0.42	0.48
20	Male	30	180	71	111/76	0.29	4.9	201.95	9.46	300	10.81	59.61	57.65	3.25	0.08	<0.44	3.94	<0.10	0.64	14.4	<2.2	34.5	34.5	0.58	0.21	0.78	3.92	1.73	0.59	0.53
21	Male	20	170	64	128/75	0.18	3.6	126	11.68	240	14.62	78.4	41.93	2	<0.08	<0.44	3.14	<0.10	0.49	11.3	<2.2	15.7	15.7	0.29	0.22	0.85	29.24	1.27	0.7	0.49
22	Male	20	184	62	113/74	0.08	1.4	22.07	16.23	2540	9.41	91.36	65.67	8.09	0.13	<0.44	6.17	<0.10	0.49	10.3	<2.2	27.6	27.6	0.67	0.18	0.7	17.15	1.21	1.28	0.6
23	Male	33	174	70	118/77	0.1	2.5	40.36	11.2	940	6.45	59.05	63.01	4.14	0.22	<0.44	3.17	<0.10	0.55	10.3	<2.2	25.3	25.3	1.27	0.2	0.62	18.53	0.91	0.73	0.42
24	Female	28	153	48	93/61	0.48	7.9	20.45	17.15	1670	8.39	46.74	38.51	1.69	<0.08	<0.44	5.59	<0.10	0.31	9.7	<2.2	9.8	9.8	0.66	0.19	0.66	29.49	1.06	0.45	0.42
25	Male	22	173	89	144/91	0.2	2.5	121.97	10.86	990	9.98	62.59	52.36	2.41	<0.08	<0.44	1.89	<0.10	0.52	7.8	<2.2	12.1	12.1	1.67	0.25	0.64	8.25	1.6	0.82	0.41
26	Male	36	172	81	107/76	0.09	1.2	27.1	15.08	1060	70.21	49.19	49.75	2.02	<0.08	<0.44	0.9	<0.10	0.52	13.2	<2.2	20.7	20.7	1.29	0.22	0.76	12.64	1.43	0.68	0.56
27	Female	42	168	54	136/92	0.05	1.3	154.24	15.66	710	7.68	69.37	31.39	2.83	0.13	<0.44	7.2	<0.10	0.43	9.8	<2.2	15.3	15.3	0.69	0.18	0.76	14.53	1.13	0.68	0.53
28	Male	48	174	88	125/84	0.12	1.6	48.65	15.37	610	26.53	104.73	88.25	44.77	0.16	<0.44	6.67	<0.10	0.71	16.2	<2.2	18	18	1.81	0.17	0.54	25.86	10.16	1.82	0.5
